# Supplementary material
Source: publisher figshare collection journal article supplement (https://acs.figshare.com/ndownloader/files/4550815)
Supplement: Supplementary file 1 [file 4550815]

 
data_08315t 
  
_audit_creation_method            SHELXL-97 
_chemical_name_systematic 
; 
 ? 
; 
_chemical_name_common             dcpm(AuBr)(AuBr3) 
_chemical_melting_point           ? 
_chemical_formula_moiety          ? 
_chemical_formula_sum 
 'C25 H46 Au2 Br4 P2' 
_chemical_formula_weight          1122.13 
  
loop_ 
 _atom_type_symbol 
 _atom_type_description 
 _atom_type_scat_dispersion_real 
 _atom_type_scat_dispersion_imag 
 _atom_type_scat_source 
 'C'  'C'   0.0033   0.0016 
 'International Tables Vol C Tables 4.2.6.8 and 6.1.1.4' 
 'H'  'H'   0.0000   0.0000 
 'International Tables Vol C Tables 4.2.6.8 and 6.1.1.4' 
 'P'  'P'   0.1023   0.0942 
 'International Tables Vol C Tables 4.2.6.8 and 6.1.1.4' 
 'Br'  'Br'  -0.2901   2.4595 
 'International Tables Vol C Tables 4.2.6.8 and 6.1.1.4' 
 'Au'  'Au'  -2.0133   8.8022 
 'International Tables Vol C Tables 4.2.6.8 and 6.1.1.4' 
  
_symmetry_cell_setting            Monoclinic 
_symmetry_space_group_name_H-M    P2(1)/n 
  
loop_ 
 _symmetry_equiv_pos_as_xyz 
 'x, y, z' 
 '-x+1/2, y+1/2, -z+1/2' 
 '-x, -y, -z' 
 'x-1/2, -y-1/2, z-1/2' 
  
_cell_length_a                    11.7519(9) 
_cell_length_b                    14.3982(10) 
_cell_length_c                    19.2592(14) 
_cell_angle_alpha                 90.00 
_cell_angle_beta                  95.4610(10) 
_cell_angle_gamma                 90.00 
_cell_volume                      3244.0(4) 
_cell_formula_units_Z             4 
_cell_measurement_temperature     100(2) 
_cell_measurement_reflns_used     9990 
_cell_measurement_theta_min       2.24 
_cell_measurement_theta_max       31.27 
  
_exptl_crystal_description        irregular 
_exptl_crystal_colour             red 
_exptl_crystal_size_max           0.30 
_exptl_crystal_size_mid           0.30 
_exptl_crystal_size_min           0.20 
_exptl_crystal_density_meas       'not measured' 
_exptl_crystal_density_diffrn     2.298 
_exptl_crystal_density_method     'not measured' 
_exptl_crystal_F_000              2096 
_exptl_absorpt_coefficient_mu     14.074 
_exptl_absorpt_correction_type    empirical 
_exptl_absorpt_correction_T_min   0.0708 
_exptl_absorpt_correction_T_max   0.1651 
_exptl_absorpt_process_details    sadabs 
  
_exptl_special_details 
; 
 ? 
; 
  
_diffrn_ambient_temperature       100(2) 
_diffrn_radiation_wavelength      0.71073 
_diffrn_radiation_type            MoK\a 
_diffrn_radiation_source          'fine-focus sealed tube' 
_diffrn_radiation_monochromator   graphite 
_diffrn_measurement_device_type   'Bruker APEX-II CCD' 
_diffrn_measurement_method        '\f and \w scans' 
_diffrn_detector_area_resol_mean  ? 
_diffrn_reflns_number             73851 
_diffrn_reflns_av_R_equivalents   0.0602 
_diffrn_reflns_av_sigmaI/netI     0.0374 
_diffrn_reflns_limit_h_min        -16 
_diffrn_reflns_limit_h_max        16 
_diffrn_reflns_limit_k_min        -20 
_diffrn_reflns_limit_k_max        20 
_diffrn_reflns_limit_l_min        -27 
_diffrn_reflns_limit_l_max        27 
_diffrn_reflns_theta_min          1.77 
_diffrn_reflns_theta_max          30.51 
_reflns_number_total              9877 
_reflns_number_gt                 8200 
_reflns_threshold_expression      >2sigma(I) 
  
_computing_data_collection        'Bruker APEX2' 
_computing_cell_refinement        'Bruker SAINT' 
_computing_data_reduction         'Bruker SAINT' 
_computing_structure_solution     'SHELXS-97 (Sheldrick, 2008)' 
_computing_structure_refinement   'SHELXL-97 (Sheldrick, 2008)' 
_computing_molecular_graphics     'Bruker SHELXTL' 
_computing_publication_material   'Bruker SHELXTL' 
  
_refine_special_details 
; 
 Refinement of F^2^ against ALL reflections.  The weighted R-factor wR and 
 goodness of fit S are based on F^2^, conventional R-factors R are based 
 on F, with F set to zero for negative F^2^. The threshold expression of 
 F^2^ > 2sigma(F^2^) is used only for calculating R-factors(gt) etc. and is 
 not relevant to the choice of reflections for refinement.  R-factors based 
 on F^2^ are statistically about twice as large as those based on F, and R- 
 factors based on ALL data will be even larger. 
; 
  
_refine_ls_structure_factor_coef  Fsqd 
_refine_ls_matrix_type            full 
_refine_ls_weighting_scheme       calc 
_refine_ls_weighting_details 
 'calc w=1/[\s^2^(Fo^2^)+(0.0363P)^2^+11.2040P] where P=(Fo^2^+2Fc^2^)/3' 
_atom_sites_solution_primary      direct 
_atom_sites_solution_secondary    difmap 
_atom_sites_solution_hydrogens    geom 
_refine_ls_hydrogen_treatment     noref 
_refine_ls_extinction_method      none 
_refine_ls_extinction_coef        ? 
_refine_ls_number_reflns          9877 
_refine_ls_number_parameters      298 
_refine_ls_number_restraints      0 
_refine_ls_R_factor_all           0.0444 
_refine_ls_R_factor_gt            0.0319 
_refine_ls_wR_factor_ref          0.0805 
_refine_ls_wR_factor_gt           0.0748 
_refine_ls_goodness_of_fit_ref    1.048 
_refine_ls_restrained_S_all       1.048 
_refine_ls_shift/su_max           0.001 
_refine_ls_shift/su_mean          0.000 
  
loop_ 
 _atom_site_label 
 _atom_site_type_symbol 
 _atom_site_fract_x 
 _atom_site_fract_y 
 _atom_site_fract_z 
 _atom_site_U_iso_or_equiv 
 _atom_site_adp_type 
 _atom_site_occupancy 
 _atom_site_symmetry_multiplicity 
 _atom_site_calc_flag 
 _atom_site_refinement_flags 
 _atom_site_disorder_assembly 
 _atom_site_disorder_group 
Au1 Au 0.264574(15) 0.823676(12) 0.211932(9) 0.01635(5) Uani 1 1 d . . . 
Br1 Br 0.37524(5) 0.95554(4) 0.25719(3) 0.02762(11) Uani 1 1 d . . . 
P1 P 0.28152(9) 0.74428(8) 0.31837(6) 0.0124(2) Uani 1 1 d . . . 
C1 C 0.3643(4) 0.6390(3) 0.3094(2) 0.0125(8) Uani 1 1 d . . . 
H1A H 0.3229 0.6006 0.2726 0.015 Uiso 1 1 calc R . . 
H1B H 0.3645 0.6039 0.3536 0.015 Uiso 1 1 calc R . . 
Au2 Au 0.611692(14) 0.773739(12) 0.332075(9) 0.01418(5) Uani 1 1 d . . . 
Br2 Br 0.23089(6) 0.90337(4) 0.09810(3) 0.03636(14) Uani 1 1 d . . . 
P2 P 0.51417(9) 0.64939(8) 0.28859(6) 0.0114(2) Uani 1 1 d . . . 
Br3 Br 0.16701(4) 0.68720(4) 0.16170(2) 0.02372(10) Uani 1 1 d . . . 
Br4 Br 0.71850(5) 0.90742(4) 0.37604(3) 0.02749(12) Uani 1 1 d . . . 
C11 C 0.1389(4) 0.7017(3) 0.3347(2) 0.0159(8) Uani 1 1 d . . . 
H11 H 0.1216 0.6499 0.3007 0.019 Uiso 1 1 calc R . . 
C12 C 0.1340(4) 0.6581(4) 0.4077(3) 0.0204(9) Uani 1 1 d . . . 
H12A H 0.1937 0.6098 0.4156 0.025 Uiso 1 1 calc R . . 
H12B H 0.1486 0.7065 0.4440 0.025 Uiso 1 1 calc R . . 
C13 C 0.0158(4) 0.6149(4) 0.4127(3) 0.0262(11) Uani 1 1 d . . . 
H13A H 0.0053 0.5621 0.3798 0.031 Uiso 1 1 calc R . . 
H13B H 0.0115 0.5906 0.4604 0.031 Uiso 1 1 calc R . . 
C14 C -0.0791(4) 0.6848(4) 0.3961(3) 0.0299(12) Uani 1 1 d . . . 
H14A H -0.0728 0.7350 0.4314 0.036 Uiso 1 1 calc R . . 
H14B H -0.1540 0.6540 0.3979 0.036 Uiso 1 1 calc R . . 
C15 C -0.0718(4) 0.7264(4) 0.3234(3) 0.0307(12) Uani 1 1 d . . . 
H15A H -0.0824 0.6766 0.2879 0.037 Uiso 1 1 calc R . . 
H15B H -0.1337 0.7725 0.3135 0.037 Uiso 1 1 calc R . . 
C16 C 0.0433(4) 0.7731(4) 0.3188(3) 0.0216(10) Uani 1 1 d . . . 
H16A H 0.0527 0.8248 0.3527 0.026 Uiso 1 1 calc R . . 
H16B H 0.0471 0.7989 0.2714 0.026 Uiso 1 1 calc R . . 
C21 C 0.3503(4) 0.8105(3) 0.3919(2) 0.0148(8) Uani 1 1 d . . . 
H21 H 0.4170 0.8428 0.3741 0.018 Uiso 1 1 calc R . . 
C22 C 0.2738(4) 0.8871(3) 0.4176(2) 0.0193(9) Uani 1 1 d . . . 
H22A H 0.2079 0.8588 0.4381 0.023 Uiso 1 1 calc R . . 
H22B H 0.2440 0.9266 0.3778 0.023 Uiso 1 1 calc R . . 
C23 C 0.3437(5) 0.9467(4) 0.4727(3) 0.0258(11) Uani 1 1 d . . . 
H23A H 0.4072 0.9773 0.4513 0.031 Uiso 1 1 calc R . . 
H23B H 0.2943 0.9957 0.4898 0.031 Uiso 1 1 calc R . . 
C24 C 0.3917(5) 0.8870(4) 0.5333(3) 0.0257(11) Uani 1 1 d . . . 
H24A H 0.3280 0.8595 0.5565 0.031 Uiso 1 1 calc R . . 
H24B H 0.4375 0.9261 0.5679 0.031 Uiso 1 1 calc R . . 
C25 C 0.4660(4) 0.8102(4) 0.5085(2) 0.0216(10) Uani 1 1 d . . . 
H25A H 0.4943 0.7708 0.5486 0.026 Uiso 1 1 calc R . . 
H25B H 0.5330 0.8378 0.4887 0.026 Uiso 1 1 calc R . . 
C26 C 0.3991(4) 0.7499(3) 0.4529(2) 0.0166(9) Uani 1 1 d . . . 
H26A H 0.4504 0.7022 0.4359 0.020 Uiso 1 1 calc R . . 
H26B H 0.3361 0.7177 0.4737 0.020 Uiso 1 1 calc R . . 
C31 C 0.4995(4) 0.6509(3) 0.1928(2) 0.0165(9) Uani 1 1 d . . . 
H31 H 0.4370 0.6966 0.1797 0.020 Uiso 1 1 calc R . . 
C32 C 0.6044(5) 0.6892(4) 0.1603(3) 0.0261(11) Uani 1 1 d . . . 
H32A H 0.6273 0.7494 0.1823 0.031 Uiso 1 1 calc R . . 
H32B H 0.6691 0.6454 0.1691 0.031 Uiso 1 1 calc R . . 
C33 C 0.5771(5) 0.7025(4) 0.0823(3) 0.0299(12) Uani 1 1 d . . . 
H33A H 0.6466 0.7234 0.0615 0.036 Uiso 1 1 calc R . . 
H33B H 0.5180 0.7513 0.0737 0.036 Uiso 1 1 calc R . . 
C34 C 0.5341(5) 0.6123(4) 0.0475(3) 0.0256(11) Uani 1 1 d . . . 
H34A H 0.5127 0.6237 -0.0028 0.031 Uiso 1 1 calc R . . 
H34B H 0.5964 0.5657 0.0516 0.031 Uiso 1 1 calc R . . 
C35 C 0.4319(5) 0.5739(4) 0.0802(3) 0.0279(11) Uani 1 1 d . . . 
H35A H 0.4094 0.5137 0.0582 0.034 Uiso 1 1 calc R . . 
H35B H 0.3667 0.6173 0.0715 0.034 Uiso 1 1 calc R . . 
C36 C 0.4582(4) 0.5602(3) 0.1586(2) 0.0205(9) Uani 1 1 d . . . 
H36A H 0.3886 0.5388 0.1790 0.025 Uiso 1 1 calc R . . 
H36B H 0.5179 0.5120 0.1674 0.025 Uiso 1 1 calc R . . 
C41 C 0.5744(4) 0.5378(3) 0.3207(2) 0.0165(8) Uani 1 1 d . . . 
H41 H 0.5224 0.4868 0.3021 0.020 Uiso 1 1 calc R . . 
C42 C 0.6935(4) 0.5215(4) 0.2956(3) 0.0228(10) Uani 1 1 d . . . 
H42A H 0.6861 0.5174 0.2440 0.027 Uiso 1 1 calc R . . 
H42B H 0.7433 0.5752 0.3093 0.027 Uiso 1 1 calc R . . 
C43 C 0.7488(5) 0.4336(4) 0.3258(3) 0.0339(13) Uani 1 1 d . . . 
H43A H 0.8270 0.4284 0.3112 0.041 Uiso 1 1 calc R . . 
H43B H 0.7044 0.3791 0.3070 0.041 Uiso 1 1 calc R . . 
C44 C 0.7546(5) 0.4324(4) 0.4055(3) 0.0326(13) Uani 1 1 d . . . 
H44A H 0.7865 0.3724 0.4232 0.039 Uiso 1 1 calc R . . 
H44B H 0.8060 0.4825 0.4247 0.039 Uiso 1 1 calc R . . 
C45 C 0.6368(5) 0.4460(4) 0.4296(3) 0.0263(11) Uani 1 1 d . . . 
H45A H 0.6428 0.4476 0.4812 0.032 Uiso 1 1 calc R . . 
H45B H 0.5877 0.3927 0.4139 0.032 Uiso 1 1 calc R . . 
C46 C 0.5815(4) 0.5356(3) 0.4010(2) 0.0189(9) Uani 1 1 d . . . 
H46A H 0.6269 0.5893 0.4201 0.023 Uiso 1 1 calc R . . 
H46B H 0.5037 0.5409 0.4163 0.023 Uiso 1 1 calc R . . 
  
loop_ 
 _atom_site_aniso_label 
 _atom_site_aniso_U_11 
 _atom_site_aniso_U_22 
 _atom_site_aniso_U_33 
 _atom_site_aniso_U_23 
 _atom_site_aniso_U_13 
 _atom_site_aniso_U_12 
Au1 0.02167(9) 0.01642(9) 0.01054(8) 0.00263(6) -0.00068(6) 0.00344(6) 
Br1 0.0430(3) 0.0181(2) 0.0209(2) 0.00487(18) -0.0013(2) -0.0057(2) 
P1 0.0140(5) 0.0134(5) 0.0097(5) -0.0003(4) -0.0003(4) 0.0019(4) 
C1 0.0165(19) 0.0098(18) 0.0111(19) 0.0005(15) 0.0000(15) -0.0022(15) 
Au2 0.01582(8) 0.01417(8) 0.01269(8) -0.00352(6) 0.00210(6) -0.00192(6) 
Br2 0.0618(4) 0.0298(3) 0.0160(2) 0.0098(2) -0.0041(2) 0.0027(3) 
P2 0.0138(5) 0.0111(5) 0.0093(5) -0.0004(4) 0.0007(4) 0.0008(4) 
Br3 0.0283(2) 0.0273(3) 0.0138(2) -0.00085(18) -0.00670(18) -0.0022(2) 
Br4 0.0325(3) 0.0249(2) 0.0262(3) -0.0124(2) 0.0087(2) -0.0133(2) 
C11 0.0130(19) 0.020(2) 0.015(2) -0.0024(17) -0.0006(16) 0.0010(16) 
C12 0.021(2) 0.023(2) 0.017(2) 0.0027(18) 0.0010(18) -0.0014(18) 
C13 0.021(2) 0.031(3) 0.027(3) 0.003(2) 0.006(2) -0.004(2) 
C14 0.016(2) 0.047(3) 0.027(3) -0.005(2) 0.004(2) -0.002(2) 
C15 0.015(2) 0.049(4) 0.028(3) -0.002(2) 0.003(2) 0.003(2) 
C16 0.016(2) 0.031(3) 0.018(2) 0.0009(19) 0.0000(17) 0.0065(19) 
C21 0.018(2) 0.014(2) 0.0119(19) -0.0005(15) -0.0010(16) 0.0012(16) 
C22 0.021(2) 0.022(2) 0.015(2) -0.0055(18) 0.0008(17) 0.0042(18) 
C23 0.032(3) 0.024(3) 0.021(2) -0.008(2) 0.001(2) -0.001(2) 
C24 0.030(3) 0.032(3) 0.014(2) -0.010(2) -0.0024(19) -0.002(2) 
C25 0.021(2) 0.029(3) 0.014(2) -0.0015(19) -0.0040(17) -0.0026(19) 
C26 0.021(2) 0.017(2) 0.011(2) 0.0010(16) -0.0026(16) -0.0002(17) 
C31 0.024(2) 0.015(2) 0.011(2) -0.0003(16) 0.0007(17) -0.0010(17) 
C32 0.034(3) 0.026(3) 0.019(2) 0.001(2) 0.009(2) -0.007(2) 
C33 0.047(3) 0.021(2) 0.023(3) 0.000(2) 0.012(2) -0.009(2) 
C34 0.042(3) 0.027(3) 0.009(2) -0.0019(18) 0.004(2) -0.002(2) 
C35 0.038(3) 0.027(3) 0.019(2) -0.005(2) 0.003(2) -0.009(2) 
C36 0.027(2) 0.023(2) 0.012(2) -0.0037(17) 0.0027(18) -0.0070(19) 
C41 0.018(2) 0.015(2) 0.016(2) -0.0001(16) 0.0004(16) 0.0023(16) 
C42 0.022(2) 0.026(3) 0.020(2) -0.0008(19) 0.0038(18) 0.0118(19) 
C43 0.037(3) 0.034(3) 0.032(3) 0.006(2) 0.006(2) 0.023(3) 
C44 0.037(3) 0.034(3) 0.027(3) 0.008(2) -0.002(2) 0.017(2) 
C45 0.036(3) 0.021(2) 0.021(2) 0.007(2) -0.001(2) 0.006(2) 
C46 0.024(2) 0.015(2) 0.017(2) 0.0038(17) 0.0003(18) 0.0050(18) 
  
_geom_special_details 
; 
 All esds (except the esd in the dihedral angle between two l.s. planes) 
 are estimated using the full covariance matrix.  The cell esds are taken 
 into account individually in the estimation of esds in distances, angles 
 and torsion angles; correlations between esds in cell parameters are only 
 used when they are defined by crystal symmetry.  An approximate (isotropic) 
 treatment of cell esds is used for estimating esds involving l.s. planes. 
; 
  
loop_ 
 _geom_bond_atom_site_label_1 
 _geom_bond_atom_site_label_2 
 _geom_bond_distance 
 _geom_bond_site_symmetry_2 
 _geom_bond_publ_flag 
Au1 P1 2.3389(11) . ? 
Au1 Br1 2.4166(6) . ? 
Au1 Br3 2.4292(5) . ? 
Au1 Br2 2.4728(6) . ? 
P1 C1 1.818(4) . ? 
P1 C21 1.831(5) . ? 
P1 C11 1.839(5) . ? 
C1 P2 1.850(4) . ? 
Au2 P2 2.2444(11) . ? 
Au2 Br4 2.4072(5) . ? 
P2 C31 1.836(4) . ? 
P2 C41 1.839(5) . ? 
C11 C16 1.532(6) . ? 
C11 C12 1.545(6) . ? 
C12 C13 1.533(7) . ? 
C13 C14 1.513(8) . ? 
C14 C15 1.532(8) . ? 
C15 C16 1.520(7) . ? 
C21 C26 1.531(6) . ? 
C21 C22 1.533(6) . ? 
C22 C23 1.541(7) . ? 
C23 C24 1.515(8) . ? 
C24 C25 1.515(7) . ? 
C25 C26 1.535(7) . ? 
C31 C36 1.522(6) . ? 
C31 C32 1.537(7) . ? 
C32 C33 1.519(8) . ? 
C33 C34 1.525(7) . ? 
C34 C35 1.513(7) . ? 
C35 C36 1.524(7) . ? 
C41 C46 1.541(6) . ? 
C41 C42 1.541(6) . ? 
C42 C43 1.515(7) . ? 
C43 C44 1.530(8) . ? 
C44 C45 1.514(8) . ? 
C45 C46 1.524(7) . ? 
  
loop_ 
 _geom_angle_atom_site_label_1 
 _geom_angle_atom_site_label_2 
 _geom_angle_atom_site_label_3 
 _geom_angle 
 _geom_angle_site_symmetry_1 
 _geom_angle_site_symmetry_3 
 _geom_angle_publ_flag 
P1 Au1 Br1 94.01(3) . . ? 
P1 Au1 Br3 87.21(3) . . ? 
Br1 Au1 Br3 175.27(2) . . ? 
P1 Au1 Br2 175.49(3) . . ? 
Br1 Au1 Br2 89.45(2) . . ? 
Br3 Au1 Br2 89.58(2) . . ? 
C1 P1 C21 107.9(2) . . ? 
C1 P1 C11 104.0(2) . . ? 
C21 P1 C11 112.6(2) . . ? 
C1 P1 Au1 109.04(14) . . ? 
C21 P1 Au1 114.71(15) . . ? 
C11 P1 Au1 108.05(15) . . ? 
P1 C1 P2 118.8(2) . . ? 
P2 Au2 Br4 178.58(3) . . ? 
C31 P2 C41 110.2(2) . . ? 
C31 P2 C1 102.6(2) . . ? 
C41 P2 C1 101.6(2) . . ? 
C31 P2 Au2 111.16(15) . . ? 
C41 P2 Au2 113.90(16) . . ? 
C1 P2 Au2 116.53(14) . . ? 
C16 C11 C12 111.3(4) . . ? 
C16 C11 P1 113.9(3) . . ? 
C12 C11 P1 113.9(3) . . ? 
C13 C12 C11 109.6(4) . . ? 
C14 C13 C12 111.7(4) . . ? 
C13 C14 C15 110.4(4) . . ? 
C16 C15 C14 110.7(4) . . ? 
C15 C16 C11 109.3(4) . . ? 
C26 C21 C22 110.6(4) . . ? 
C26 C21 P1 113.7(3) . . ? 
C22 C21 P1 113.2(3) . . ? 
C21 C22 C23 109.4(4) . . ? 
C24 C23 C22 110.5(4) . . ? 
C23 C24 C25 110.7(4) . . ? 
C24 C25 C26 111.1(4) . . ? 
C21 C26 C25 110.0(4) . . ? 
C36 C31 C32 111.4(4) . . ? 
C36 C31 P2 114.9(3) . . ? 
C32 C31 P2 114.3(3) . . ? 
C33 C32 C31 110.3(4) . . ? 
C32 C33 C34 110.9(4) . . ? 
C35 C34 C33 111.7(4) . . ? 
C34 C35 C36 111.4(4) . . ? 
C31 C36 C35 110.2(4) . . ? 
C46 C41 C42 110.3(4) . . ? 
C46 C41 P2 109.7(3) . . ? 
C42 C41 P2 111.0(3) . . ? 
C43 C42 C41 112.0(4) . . ? 
C42 C43 C44 111.8(5) . . ? 
C45 C44 C43 110.5(5) . . ? 
C44 C45 C46 111.7(4) . . ? 
C45 C46 C41 111.1(4) . . ? 
  
_diffrn_measured_fraction_theta_max    0.997 
_diffrn_reflns_theta_full              30.51 
_diffrn_measured_fraction_theta_full   0.997 
_refine_diff_density_max    2.502 
_refine_diff_density_min   -0.891 
_refine_diff_density_rms    0.215 
